# Supplementary material
Source: HighWire-hosted journal article supplement (https://bmjopen.bmj.com/content/8/3/e016666)
Supplement: inline-supplementary-material-4 [file inline-supplementary-material-4.pdf]

## Results of full search strategy

PubMed and Cochrane Library databases were searched in March 2016 using the following keyword combinations: “antibiotic prophylaxis”, “laparoscopic cholecystectomy”, and “systematic review or meta-analysis”. This search yielded the 18 articles listed below.

1. Anthuber M, Schrempf M. Meta-analysis for perioperative antibiotics during laparoscopic cholecystectomy. *Chirurgy* 2016;87:251.
2. Pasquali S, Boal M, Griffiths EA, et al. Meta-analysis of perioperative antibiotics in patients undergoing laparoscopic cholecystectomy. *Brit J Surg* 2016;103:27–34.
3. Cochrane Upper GI and Pancreatic Diseases Group. Early routine endoscopic retrograde cholangiopancreatography strategy versus early conservative management strategy in acute gallstone pancreatitis. *Cochrane Database Syst Rev* 2012;DOI:10.1002/14651858.CD009779.pub2.
4. Yan RC, Shen SQ, Chen ZB, et al. The role of prophylactic antibiotics in laparoscopic cholecystectomy in preventing postoperative infection: a meta-analysis. *J Laparoendosc Adv Surg Tech A* 2011;21:301–6.
5. Sanabria A, Dominguez LC, Valdivieso E, et al. Antibiotic prophylaxis for patients undergoing elective laparoscopic cholecystectomy. *Cochrane Database Syst Rev* 2010;12:1–35.
6. Zhou H, Zhang J, Wang Q, et al. Meta-analysis: antibiotic prophylaxis in elective laparoscopic cholecystectomy. *Aliment Pharmacol Ther* 2009;29:1086–95.
7. Choudhary A, Bechtold ML, Puli SR, et al. Role of prophylactic antibiotics in laparoscopic cholecystectomy: A meta-analysis. *J Gastrointest Surg* 2008;12:1847–53.
8. Gurusamy KS, Samraj K. Cholecystectomy for patients with silent gallstones. *Cochrane Database Syst Rev* 2007;DOI:10.1002/14651858.CD006230.pub2.
9. Alexakis N, Neoptolemos JP. Algorithm for the diagnosis and treatment of acute biliary pancreatitis. *Scand J Surg* 2005;94:124–9.

10. Goldfaden A, Birkmeyer JD. Evidence-based practice in laparoscopic surgery: perioperative care. *Surg Innov* 2005;12:51–61.
11. Catarci M, Mancini S, Gentileschi P, et al. Antibiotic prophylaxis in elective laparoscopic cholecystectomy. Lack of need or lack of evidence? *Surg Endosc* 2004;18:638–41.
12. Al-Ghnaniem R, Benjamin IS, Patel AG. Meta-analysis suggests antibiotic prophylaxis is not warranted in low-risk patients undergoing laparoscopic cholecystectomy. *Brit J Surg* 2003;90:365–6.
13. Shah SK, Mutignani M, Costamagna G. Therapeutic biliary endoscopy. *Endoscopy* 2002;34:43053.
14. Colizza S, Rossi S. Antibiotic prophylaxis and treatment of surgical abdominal sepsis. *J Chemother* 2001;13:193–201.
15. Mandato M, Ruggiero R, Corsale I, et al. Septic complications of gallbladder lacerations during laparoscopic cholecystectomy. *G Chir* 2001;22:277–80.
16. Raraty MG, Pope IM, Finch M, et al. Choledocholithiasis and gallstone pancreatitis. *Baillieres Clin Gastroenterol* 1997;11:663–80.
17. Gondret R, Vaillard ML, Huguier M. Antibiotic prophylaxis in biliary surgery. *Ann Chir* 1995;49:493–9.
18. Gouma DJ, Obertop H. Acute calculous cholecystitis. What is new in diagnosis and therapy? *HPB Surg* 1992;6:69–78.

The 11 articles in blue font (1, 3, 8–10, 13–18) were excluded after screening because of inappropriate content.

## Reasons for exclusion

**Article 1:** Not in English

**Articles 3, 8–10, 13:** Irrelevant content

**Article 14:** Not a meta-analysis or systematic review

**Articles 15, 16:** Irrelevant content

**Article 17:** Not in English

**Article 18:** Irrelevant content
